# Supplementary material for: Mechanistic signs of double-barreled structure in a fluoride ion channel
Source: eLife journal article supplement (doi:10.7554/elife.18767), 2016-07-23
Supplement: supp [file elife_poa_e18767_Figure_2_figure_supplement_1.pdf › elife_poa_e18767_Figure_2_figure_supplement_1.pdf]

[illegible]
